1 **Mapping cellular subpopulations within triple negative breast cancer tumors provides**  
2 **a tool for cancer sensitization to radiotherapy**

3 Heba Alkhatib<sup>1#</sup>, Ariel M. Rubinstein<sup>1#</sup>, Swetha Vasudevan<sup>1</sup>, Efrat Flashner-Abramson<sup>1</sup>, Shira  
4 Stefansky<sup>1</sup>, Solomon Oguche<sup>1</sup>, Tamar Peretz-Yablonsky<sup>2</sup>, Avital Granit<sup>2</sup>, Zvika Granot<sup>3</sup>, Ittai  
5 Ben-Porath<sup>3</sup>, Kim Sheva<sup>2</sup>, Amichay Meirovitz<sup>2\*</sup> and Nataly Kravchenko-Balasha<sup>1\*</sup>

6 <sup>#</sup> Equal contribution

7 <sup>\*</sup> Equal contributors and corresponding authors

8 <sup>1</sup> Bio-medical sciences department, Faculty of Dental Medicine, The Hebrew University of  
9 Jerusalem, Jerusalem, 9103401, Israel.

10 <sup>2</sup> Sharett Institute of Oncology, Hebrew University-Hadassah Medical Center, Jerusalem,  
11 9103401, Israel.

12 <sup>3</sup> Institute for Medical Research Israel-Canada, Hebrew University Medical School,  
13 Jerusalem, 9103401, Israel.

14

15 **Running Title:** Strategy to sensitize triple negative breast tumors to RT

16

17 To whom correspondence may be addressed. Email: N.K.B: [natalyk@ekmd.huji.ac.il](mailto:natalyk@ekmd.huji.ac.il),

18 Jerusalem, zip/postal code: 91000, Phone Oficce : +972-586130500 or

19 A.M: [amichaym@gmail.com](mailto:amichaym@gmail.com), Jerusalem, zip/postal code: 91000, Phone Office:02-6778735.

20 **The authors declare no potential conflict of interest.**

21

22

23

24

25

## 26 **Summary**

27 Triple negative breast cancer (TNBC) is an aggressive type of cancer that is known to be  
28 resistant to radiotherapy (RT). Evidence is accumulating that is indicative of the plasticity of  
29 TNBC, where one cancer subtype switches to another in response to various treatments,  
30 including RT. In this study we aim to overcome tumor resistance by designing TNBC-  
31 sensitizing targeted therapies that exploit the plasticity occurring due to radiation  
32 exposure. Using single cell analysis of molecular changes occurring in irradiated TNBC tumors,  
33 we identified two initially undetected distinct subpopulations, represented by overexpressed  
34 Her2 and cMet, expanding post-RT and persisting in surviving tumors. Using murine cancer  
35 models and patient-derived TNBC tumors, we showed that only simultaneous targeting of Her2  
36 and cMet was successful in sensitizing TNBC to RT and preventing its regrowth. The strategy  
37 presented herein holds the potential to be broadly applicable in clinical use.

38

39 **Key words:** Intra-tumor heterogeneity; Radiation oncology; Radiosensitization; Triple  
40 negative breast cancer; Molecular plasticity of tumors; Information-theoretic single cell  
41 analysis; Targeted therapy

42

## 43 **Highlights**

- 44 • Sensitization of TNBC to radiotherapy (RT) is a clinically unmet need
- 45 • Single cell strategy creates a precise map of subpopulations expanding post-RT
- 46 • Evolution of intra-tumor heterogeneity is turned into a therapeutic advantage
- 47 • Simultaneous targeting of expanding subpopulations sensitizes TNBC to  
48 radiotherapy

49

## 50 **Introduction**

51 Radiotherapy emerged more than a century ago<sup>1</sup>, and continues to be a key modality in the  
52 treatment and management of various types of cancer.

53 Recent studies have shown that radiation, while effectively kills cancer cells, also promotes  
54 anti-apoptotic and pro-proliferative responses that often result in tumor regrowth<sup>1,2</sup>. This  
55 notion gave rise to numerous studies attempting to characterize tumor molecular phenotypes  
56 occurring in response to radiation, in order to develop new strategies to enhance the response  
57 of cancer to radiotherapy (see for example<sup>3-8</sup>).

58 Triple negative breast cancer (TNBC) is a clinically unique, aggressive and highly  
59 heterogeneous subtype of breast cancer that does not express estrogen receptors, progesterone  
60 receptors or human epidermal growth factor receptor-2 (Her2), and for which not a single  
61 targeted therapy has been approved. Chemotherapy (CT) and radiation therapy (RT) have  
62 therefore remained the standard treatments over the past 20 years<sup>9,10</sup>. Although TNBCs can be  
63 sensitive to RT during early treatment stages, they often develop resistance at later stages<sup>10</sup>.  
64 One of the main reasons for this is significant variability between tumor cells within the tumor,  
65 which poses a major obstacle in the treatment of TNBC tumors<sup>11,12</sup>. Moreover, accumulating  
66 evidence for the plasticity of breast cancer cells, such as a switch from Her2<sup>-</sup> to Her2<sup>+</sup>  
67 phenotypes in response to RT<sup>13</sup>, may complicate breast tumor classification and thus the  
68 design of appropriate therapy.

69 Finding a strategy with the ability to transform the potential evolution of certain  
70 subpopulations within irradiated TNBC tumors into a therapeutic advantage, is an unmet  
71 need in cancer research and clinical practice.

72 We propose a novel concept according to which TNBC sensitization can be rationally-  
73 designed based on the resolution of patient-specific intra-tumor subpopulations and  
74 examination of the dynamics thereof in response to RT treatment.

75 Considering that even very small subpopulations within the tumor may eventually give rise to  
76 tumor regrowth (e.g. tumor stem cells), it is vital that the identification of tumor  
77 subpopulations will be of high resolution.

78 Herein we employ an information theoretic technique, surprisal analysis (SA), to resolve  
79 TNBC cellular subpopulations on the single cell level, evaluate their response to RT, and  
80 design a therapeutic method to sensitize TNBC cells to RT.

81 We consider tumors to be homeostatically disturbed entities, which have deviated from their  
82 balanced state due to various constraints (e.g. mutational stress, application of drugs, etc.)<sup>14</sup>.

83 Each constraint creates a deviation in the expression levels of a subset of proteins in the  
84 tumor. Thus, a constraint creates an unbalanced process in the tumor, consisting of the group  
85 of proteins that were altered by the constraint. SA examines protein-protein correlations and,  
86 based on information theoretic and thermodynamic-like considerations, identifies the  
87 constraints that operate in the studied system as well as the proteins affected by each  
88 constraint.

89 We have previously demonstrated that the accurate identification of the signaling network  
90 structure emerging in MCF10a human mammary cells upon stimulation with EGF, allowed  
91 us to anticipate the effect of the addition of protein inhibitors on the protein network  
92 structure<sup>15</sup>. In other studies we have shown that SA of cell-cell signaling in brain tumors  
93 provides a prediction about cellular spatial distributions and the direction of cell-cell  
94 movement<sup>16</sup>. We have also implemented SA in large-scale proteomic datasets obtained from

95 multiple cancer types and demonstrated how this analysis successfully predicts efficient  
96 patient-specific targeted combination therapies<sup>17</sup>.

97 In this research, we utilize SA to study single cells. For each cell we identify a cell-specific  
98 signaling signature – **CSSS**, consisting of a set of unbalanced processes that have emerged  
99 within the individual cell. We then define an intra-tumor subpopulation to be a group of cells  
100 harboring the exact same CSSS. These cells are expected to respond similarly to treatment.  
101 The final result of the analysis is a high-resolution intra-tumoral map of the different  
102 subpopulations within the tumor, and the CSSS that operates in every subpopulation.  
103 Importantly, even very small subpopulations comprising less than 1% of the total detected  
104 population can be captured using our strategy. Such a robust and comprehensive map has the  
105 ability to provide guidance on the accurate determination of drug combinations to effectively  
106 target dominant subpopulations, as well as small and persistent subpopulations within the  
107 tumor, and bring about a potent therapeutic effect.

108 A 4T1 murine model for stage IV TNBC<sup>18</sup> is utilized in this study, as well as human TNBC and  
109 patient-derived xenograft models. We show that upon RT treatment in-vitro and in-vivo, all  
110 models demonstrate a significant expansion of two distinct cellular subpopulations: one with  
111 upregulated EGFR/Her2 and another with upregulated cMet/MUC1. These subpopulations are  
112 barely detectable in untreated tumors. We believe that the poor response of TNBC to RT can be  
113 overcome by inhibiting the growth of these subpopulations. We validate our hypothesis by  
114 showing that RT-treated TNBC tumors that are simultaneously pretreated with both anti-Her2  
115 (Trastuzumab) and anti-cMet (Crizotinib) inhibitors do not relapse in-vitro or in-vivo.  
116 Assessment of each targeted drug alone demonstrates a significantly smaller effect.

117 In summary, this study provides a novel framework for the resolution of tumor-specific cellular  
118 heterogeneity at the single cell level. We show that accurate mapping of tumor cellular  
119 subpopulations within a TNBC mass can provide guidance on how to incorporate targeted  
120 therapy with RT in order to overcome resistance.

121 The proposed approach is expected to augment the success of radiotherapy in clinical oncology  
122 and significantly improve the outcome of TNBC and potentially other cancer types.

123

## 124 Results

### 125 Overview of the integrated experimental-computational approach

126 We based our study on the notion that TNBC tumors that undergo irradiation treatment, while  
127 initially responding to the treatment, eventually relapse and regrow (**Fig. 1**). We hypothesized  
128 that the ability of the tumors to relapse stems from the existence of intra-tumoral subpopulations

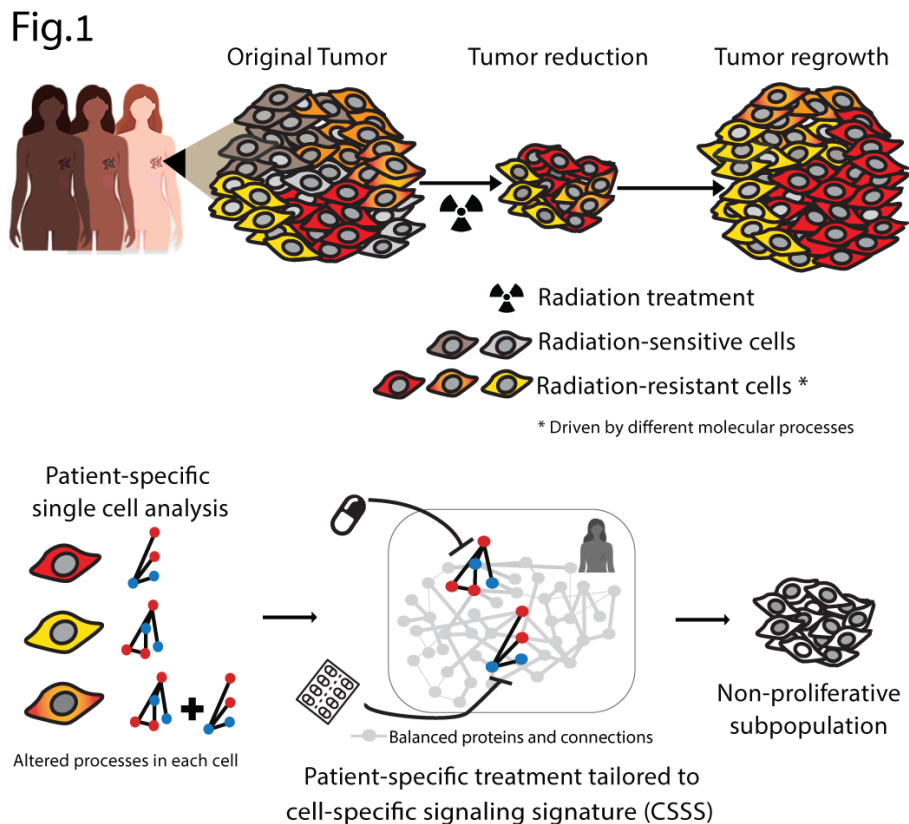

129 **Figure 1. Decoding intra-tumor heterogeneity into distinct subpopulations after radiation treatment offers**  
130 **potential new targets for tumor-specific therapy.**

131 Top: Phenotypic variations due to intra-tumor heterogeneity pose a significant challenge in attaining optimal patient-  
132 specific therapy regimens . Bottom: Utilizing high throughput flow cytometry and single cell surprisal analysis,  
133 patient-specific tumor network structures are identified, with the elucidation of cellular subpopulations and altered  
134 processes in each subpopulation, pre- and post- radiotherapy. Accurate targeting of resistant subpopulations aims to  
135 prevent cellular expansion by sensitizing the tumor to RT.  
136

137 that do not respond well to the irradiation treatment and drive the regrowth of the tumor post-  
138 radiation (**Fig. 1**, top).

139 We set out to study TNBC tumor composition on the single cell level, aiming to identify a set of  
140 intra-tumoral subpopulations, including relatively small subpopulations, that exhibit a  
141 diminished response to RT treatment. By elucidating the altered molecular processes that each  
142 subpopulation harbors, we devised a therapeutic strategy believed to intensify the response of the  
143 tumor to RT (**Fig. 1**, bottom).

144 Several dimensionality reduction algorithms have been developed to interpret single cell  
145 variations (e.g. variations in protein or gene expression levels), such as clustering-based t-SNE  
146 analysis<sup>19</sup> or principle component analysis (PCA)<sup>20–22</sup>. These methods are very useful in  
147 statistical determination of dominant expression patterns but are limited when a more  
148 deterministic partitioning of the tumor mass into cellular subpopulations, based on cell-specific  
149 sets of altered molecular processes, is required. For example, t-SNE is a non-deterministic  
150 method (e.g. different runs with the same hyper parameters may produce different results) and is  
151 unable to assign a certain protein to several processes, or to determine which processes are active  
152 in every cell. Therefore t-SNE will be less efficient when the determination of robust cell-  
153 specific signaling signatures is required (e.g. for drug combination design). Similarly, PCA  
154 focuses mainly on the most dominant patterns obtained from proteins with the highest variability  
155 in the population, rather than on cell-specific sets of altered processes (for more details see  
156 references <sup>23,24</sup>).

157 We sought a deterministic approach, in which every single cell can be plotted according to its  
158 molecular aberrations and network reorganization. To this end, we employed surprisal analysis  
159 (SA), an information theoretic method<sup>14,25</sup> originally applied to characterize the dynamics of  
160 non-equilibrium systems in chemistry and physics<sup>26,27</sup>. This analysis has recently been utilized to  
161 quantify bulk proteomic changes in large datasets, including multiple patient tissues and cancer  
162 cell lines, in order to predict a change in the behavior of the systems<sup>15,28</sup> or design individualized  
163 drug therapies<sup>17</sup>.

164 Herein, we extend the approach to quantify expression changes in single cells in order to  
165 accurately characterize the changes occurring in tumor cellular populations in response to RT.  
166 Our analysis is based on the premise that the application of radiotherapy to TNBC cells induces  
167 certain constraints within the tumor mass. These constraints result in altered expression levels of  
168 certain proteins relative to their balanced levels. This in turn reflects the plasticity of the tumor in  
169 response to RT. SA recognizes the constraints operating in the system by identifying groups of  
170 proteins that exhibit similar deviations from their balanced state (**Fig. 1**). A group of proteins  
171 demonstrating similar alterations in expression patterns is defined as an *unbalanced process*.  
172 Hence, every constraint that operates on the system gives rise to an unbalanced process.

173 SA identifies the unbalanced processes that operate in the system under study, including the  
174 group of proteins affected by each process. Each protein may participate in several processes<sup>17</sup>.

175 It is important to note that not all processes are active in all cells, i.e. a certain process can have  
176 negligible amplitude in some cells and significant amplitude in others. A number of different  
177 unbalanced processes may operate simultaneously in every cell (**Fig. 1**). The cell-specific  
178 signaling signature (CSSS) is defined for each cell, according to the set of active unbalanced  
179 processes in that specific cell (See Methods for additional details).



180 To collect high resolution data regarding the intra-tumoral composition of TNBC tumors, we  
181 employed the following experimental technique : Samples obtained from multiple sources (e.g.  
182 cell lines, mouse models and patient-derived tumor cells) were processed into single cell  
183 suspensions. The cell suspensions were then labeled with fluorescently-labeled antibodies  
184 targeting selected cell-surface oncoproteins and assayed by multicolor FACS to reveal accurate  
185 protein expression levels in each single cell.

186 In each experimental condition approximately 30,000-50,000 single cells were profiled allowing  
187 for the identification of different subpopulations, including very small subpopulations  
188 (comprising less than 1% of the total population) that have significantly limited detection rates  
189 when using standard pathological tests.

#### 190 *Selection of oncomarkers for single cell analysis*

191 The selection of the protein panel for FACS analysis was based on unbiased gene expression  
192 data analysis of TNBC tumors responding to cytotoxic stress (irradiation and chemotherapy) and  
193 an extensive literature search to filter out oncoproteins that best represent possible expression  
194 patterns in TNBC cells<sup>29-35</sup>.

195 Gene expression data was obtained from 14 patient-derived TNBC tissues that were irradiated  
196 and treated with Taxol<sup>36</sup>. Four of the patients achieved pathologic complete response (pCR),  
197 while 10 remained with residual disease and were classified as non-pCR (NR, **Fig.2a**). First,  
198 using unbiased *bulk* surprisal analysis, we identified co-expressed altered gene expression  
199 patterns, *unbalanced processes*, characterizing the variability of the dataset<sup>14,24</sup> (**Fig.2a**). The  
200 dataset (28 samples -representing 14 tumors measured in duplicate) was characterized by 14  
201 unbalanced processes (**Fig.2b**, Methods). To provide biological interpretation of these processes,  
202 transcripts with significant weights (**Fig.2a**, Methods and Table S1) were classified into

203 biological categories based on Gene Ontology (Methods, Table S1). For example, process 1+  
 204 included upregulated transcripts involved in multiple categories belonging to the cell cycle and  
 205 signal transduction, while process 2+ to the cell cycle and DNA damage (Table S1). Biological  
 206 characterization of all processes is provided in Table S1. Central transcripts that could serve as  
 207 representatives of these 14 processes were sought next.

Fig . 2

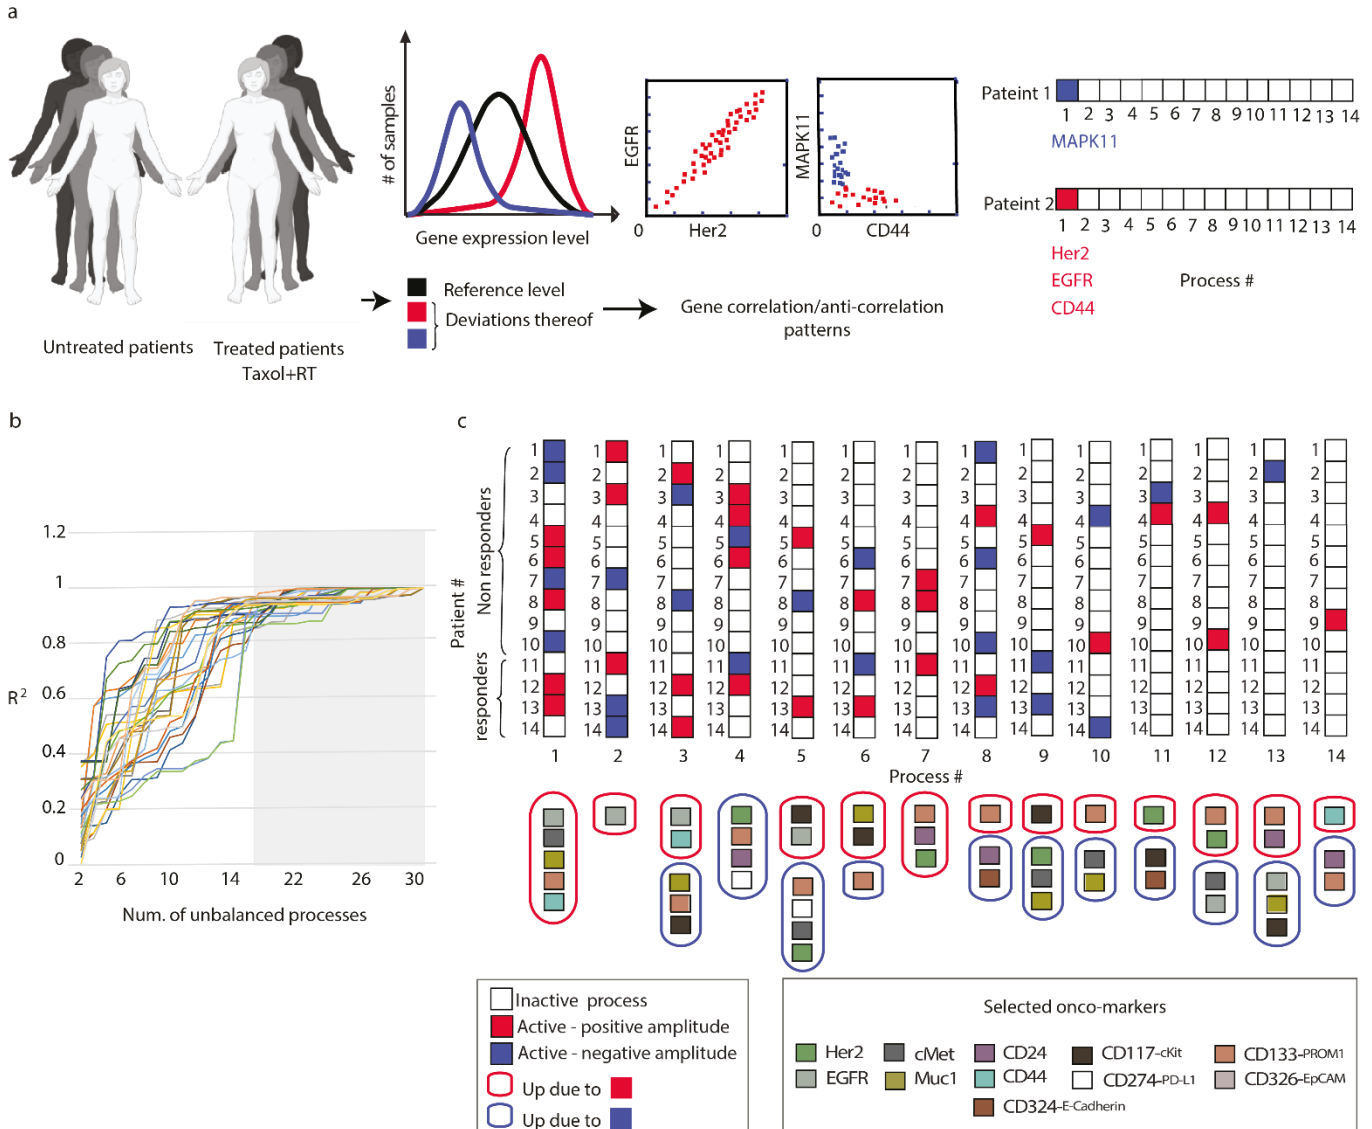

208  
 209 **Figure 2. Utilizing gene expression profiling to select oncomarkers for single cell analysis** (a) Quantitative gene  
 210 expression data obtained from a cohort of TNBC tumors irradiated and treated with Taxol, is used for surprisal  
 211 analysis. Extent of variability in gene expression levels is quantified for each transcript, and further visualized and  
 212 quantified using gene expression distribution histograms. Transcripts whose expression levels deviate from the

213 reference state in the same or opposite directions, i.e. co-varying transcripts, are grouped further into correlation  
214 networks (exemplified here by EGFR, HER2, MAPK11 and CD44). In this example EGFR and HER2 are  
215 correlated, whereas the expression levels of MAPK11 and CD44 are anticorrelated and deviate from the steady state  
216 in an opposite manner. **(b)** 14 significant unbalanced processes (Table S2) were found in the dataset based on error  
217 calculation that characterize gene expression variability in the dataset<sup>24,37</sup>. **(c)** A patient-specific combination of  
218 unbalanced processes was calculated for every patient (see also Table S2). Combinations were generated  
219 using amplitude values that exceeded threshold limits calculated as explained previously<sup>24</sup>. For example patient 1  
220 has three active processes: 1, 2 and 8. Negative/positive amplitude denote how the patients are correlated with  
221 respect to a particular process. 11 differentially expressed transcripts (Her2, EGFR etc., lower panel), belonging to  
222 various biological categories, such as cell proliferation, motility, EMT and cancer stem cells, were found to  
223 participate in different 14 processes and were selected further as representatives of this variability.

224

225 Eleven cell-surface oncoproteins capturing the gene expression variability in TNBC patients  
226 were selected, and appeared both in pCR and non-pCR patients: Her2, EGFR, EpCAM, CD44,  
227 CD24, PD-L1, KIT, CD133, E-Cadherin, cMet and MUC1 (**Fig. 2c**). These oncomarkers are also  
228 known to be involved in breast cancer/cancer stem cell proliferation and represent potential drug  
229 targets for therapy or biomarkers for diagnostics<sup>29–35,38</sup>. To examine the response of TNBC to  
230 irradiation, single cell measurements were performed in which the selected 11 biomarkers were  
231 quantified in each cell.

232 *Single cell SA*

233 FACS measurements (**Fig. 3a**) were analyzed by single cell SA to reveal proteins that  
234 demonstrate deviations in expression levels relative to their reference state levels (**Fig. 3b**).  
235 Cell-specific protein-protein correlation expression patterns were then examined (**Fig. 3c,d**)  
236 to identify newly emerged unbalanced processes as well as the sets of unbalanced processes  
237 that operate in specific cells, namely the **CSSS (Fig. 3d)**. Each CSSS is graphically represented  
238 by a cell-specific barcode where white squares indicate inactive and black/gray indicate active  
239 processes in a cell (**Fig. 3d**, right panel). We then define cellular subpopulations as groups of  
240 cells harboring the same CSSS (**Fig. 3e**).

241 Note that different subpopulations may share similar processes, e.g. the red and orange  
 242 subpopulations in Figure 3 both harbor unbalanced process 3 (**Fig. 3d**). However, the complete  
 243 set of unbalanced processes in each subpopulation, namely the CSSS, is what governs the  
 244 therapeutic strategy that should be taken.  
 245 The in-depth information collected in the previous steps is utilized to devise a therapeutic  
 246 strategy that incorporates targeted therapies to aid RT. This is achieved by targeting the  
 247 dominant and RT-resistant subpopulations, to potentially achieve long term tumor remission  
 248 (**Fig. 3f**).

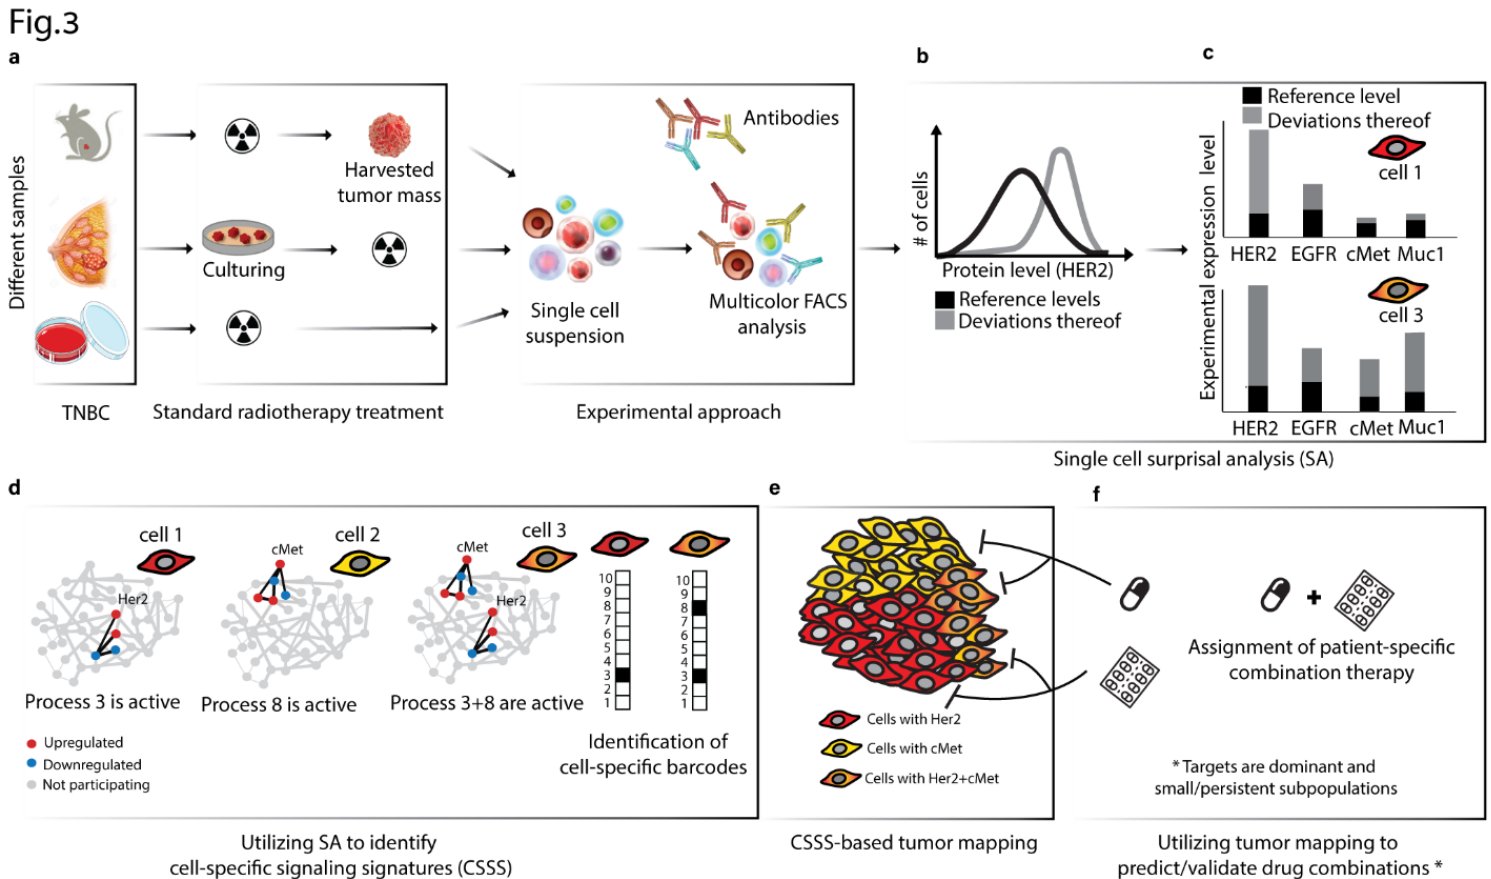

249

250 **Figure 3. Schematic of the application of the surprisal analysis algorithm.** (a) Preparation of fluorescently-tagged  
 251 single cell suspensions from different sample sources post-irradiation for cytometry analysis (right panel). (b) Using  
 252 30,000-50,000 cells/sample, surprisal analysis reveals protein expression level distributions at the reference (balanced)  
 253 state and deviations thereof. (c) Proteins that deviate in a similar manner from the references (e.g. both induced in a  
 254 certain group of cells) are grouped into altered subnetworks, referred to as “unbalanced processes”. (d) Unbalanced  
 255 processes with significant amplitudes are assigned to each cell providing a cell-specific signaling signature (CSSS).

256 Each CSSS is transformed into a cell specific barcode (right panel). (e) Cells sharing the same barcode are organized  
257 into distinct subpopulations. (f) Tumor-specific targeted therapy combinations are tailored to the CSSS.

258

259 **10 unbalanced processes give rise to the expression variations of 11 cell-surface proteins in**  
260 **4T1 mouse TNBC cells**

261 4T1 cells, obtained from a spontaneously developed tumor in an immunocompetent murine  
262 model for stage IV TNBC<sup>18</sup>, were irradiated using two doses (5 Gy or 15 Gy), and then grown  
263 under standard conditions for 24h, 48h and 6 days. The cells were then suspended and the  
264 expression levels of the selected panel of 11 cell-surface oncoproteins in single cells were  
265 measured using FACS. Figures **4a** and **S1** show the overall distributions of expression levels of  
266 the different proteins in the cells measured.

267 Two-dimensional correlation plots were created to gain insight into the behavior of these  
268 proteins in single cells. For example, although cMet and Her2 were both upregulated in response  
269 to RT, their expression levels showed poor correlation (**Fig. 4b**), where on the contrary, EGFR  
270 and Her2 levels demonstrated a strong correlation (**Fig. 4c**), as did MUC1 and cMet expression  
271 levels (**Fig. 4d**).

272 Note, however, that a strong correlation between EGFR and Her2 does not necessarily mean that  
273 these proteins participate in the same unbalanced processes in all tested cells. Small  
274 subpopulations of cells unaffected by the same processes, and possibly displaying a poorer  
275 correlation between these proteins, may be overlooked when studying variations in all cells  
276 simultaneously (**Fig. 4c**, black circles). Similarly, small subpopulations of cells that demonstrate  
277 a strong correlation between cMet and Her2 may exist, but nevertheless be masked by the  
278 representation shown in Figure 3b. Moreover, the expression level of a certain protein can be  
279 influenced by several processes due to non-linearity of biochemical processes: a certain pair of  
280 proteins can be correlated or non correlated in the different unbalanced processes operating in the

281 same cell, further complicating the interpretation of these 2D correlation plots. We therefore  
282 performed single cell SA to map the unbalanced processes operating in the entire cellular  
283 population as well as in each single cell (see Methods and Poovathingal et al.<sup>25</sup> for details).  
284 The analysis revealed 10 unbalanced processes (i.e. altered protein-protein correlation patterns  
285 resulting from 10 constraints) occurring in the untreated/treated cells (**Fig. 4f, Fig. S2**). Four of  
286 the processes, all appearing in at least 1% of the treated and/or untreated cells are shown (**Fig.**  
287 **4f**; the remaining unbalanced processes are presented in **Fig. S2**). The most abundant processes,  
288 indexed 1 and 2, appeared in 25% and 18% of the untreated cells, respectively. Processes 3 and  
289 8, which included correlated Her2/EGFR and cMet/Muc1, respectively, initially demonstrated  
290 low abundancy, and appeared in 0.3% and 0.5% of the untreated cells, respectively (**Fig. 4f,**  
291 **Table S3**). Processes 3 and 8 became more dominant 6 days post-RT (**Table S3**; more details in  
292 the next sections).

293

294 **8 sets of unbalanced processes, or 8 distinct CSSS's, were resolved suggesting that the cells**  
295 **form 8 distinct subpopulations**

296 As mentioned above, more than one unbalanced process can operate in every cell. Therefore, to  
297 gain in-depth information regarding the complete altered signaling signature in each cell, we  
298 examined the sets of unbalanced processes in the cells studied, namely the CSSS.

299 We found that 8 different sets of unbalanced processes, representing 8 distinct signaling  
300 signatures (CSSS), repeated themselves in the population of cells before and/or after RT (**Fig.**

301 **4g)**. For the simplicity of representation, each CSSS was translated into a cell-specific barcode in  
 302 which active/inactive processes were color-labeled (**Fig. 4g**).

Fig. 4

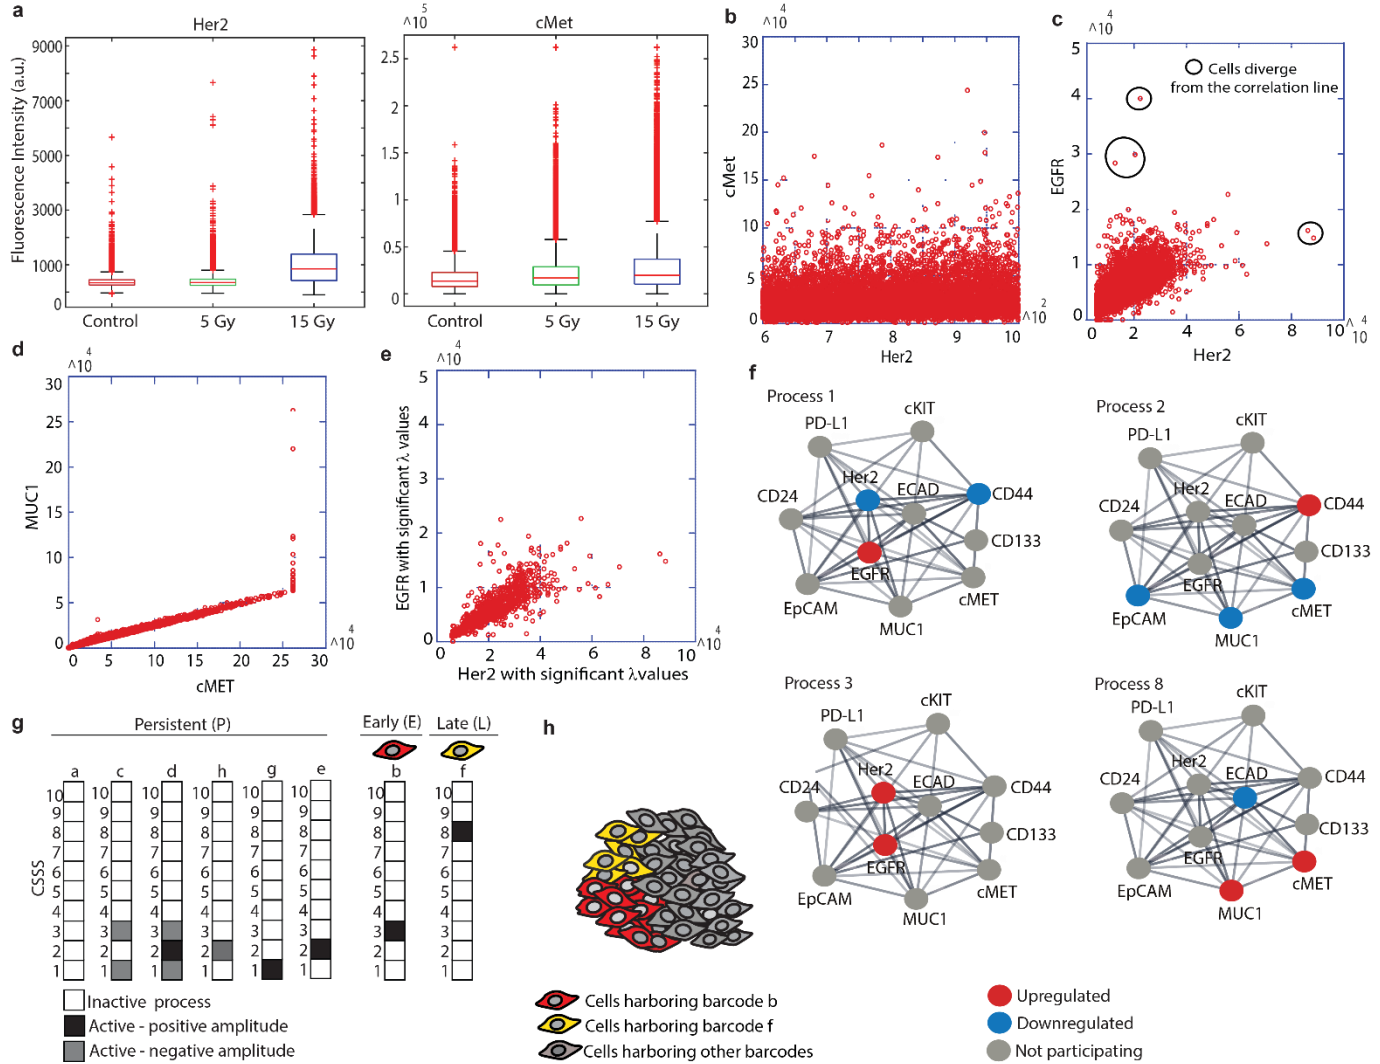

303  
 304  
 305 **Figure 4. Resolution of expanded subpopulations in 4T1 cellular population post irradiation.**  
 306 (a) FACS expression levels of Her2 and cMet following RT. (b-d) FACS experimental data plotted as correlation  
 307 plots between Her2 and cMet (b), Her2 and EGFR (c), and MUC1 and cMet (d). (e) Correlation plot between Her2  
 308 and EGFR expression levels including the cells with significant  $\lambda_3(\text{cell})$  values (Methods). (f) Four examples of 10  
 309 unbalanced subnetworks (processes) resolved in 4T1 are shown. Protein-protein interactions were determined using  
 310 the String database. (g) Each cell was assigned a barcode representing CSSS. Most abundant (>1%) subpopulations  
 311 are presented. Based on these CSSSS the tumor was divided into distinct subpopulations (h).  
 312

313 Only unbalanced processes with significant amplitudes were included in the CSSS of each  
314 individual cell (**Fig. S3, S4** and Methods). Figure **3e** shows how selecting only cells with high  
315 amplitudes improves the correlation between relevant proteins within the processes and thus the  
316 accuracy of the unbalanced processes in the analysis.

317 Additionally, only CSSS's that appeared in at least 1% of the cells were taken into account. The  
318 barcodes of these abundant subpopulations consisted of processes 1, 2, 3 and 8 (**Fig. 4f, g**).

319

### 320 **The 8 abundant cellular subpopulations demonstrate different temporal behaviors and** 321 **different variations in abundance**

322 When we examined the temporal behavior of the abundant subpopulations, we found that they  
323 could be divided into 3 groups: (1) persistent subpopulations, which decreased 48h post-RT and  
324 then returned to their previous size 6d post-RT; (2) early subpopulation, which was minor  
325 initially (<1%), and then expanded 48h and 6d post-RT (>1%); (3) late subpopulations, which  
326 was small prior to RT and expanded 6d post-RT (a schematic representation of the different  
327 temporal behaviors is shown in **Fig. 5a**).

328 The abundance of persistent subpopulations did not change 6 days post-RT treatment. For  
329 example, subpopulation **c** comprised 14.5% of the cells before RT, and a similar percentage of  
330 the cells, 14.2%, was found to comprise this subpopulation 6 days post-RT. However, early and  
331 late subpopulations, **b** and **f**, respectively, expanded significantly 6 days post-RT (**Fig. 5b**).

332 Subpopulation **b** harbored only process 3, in which Her2 and to a lesser extent EGFR (**Fig.4g**),  
333 were induced (**Fig. 5b, Table S3**). Strikingly, subpopulation **b** was induced 60-fold post-  
334 irradiation relative to the non-irradiated cells (expanded from low (<1%) levels in untreated cells  
335 to ~19-22% of the population, 6 days post-RT, **Fig. 5b**).



Fig. 5

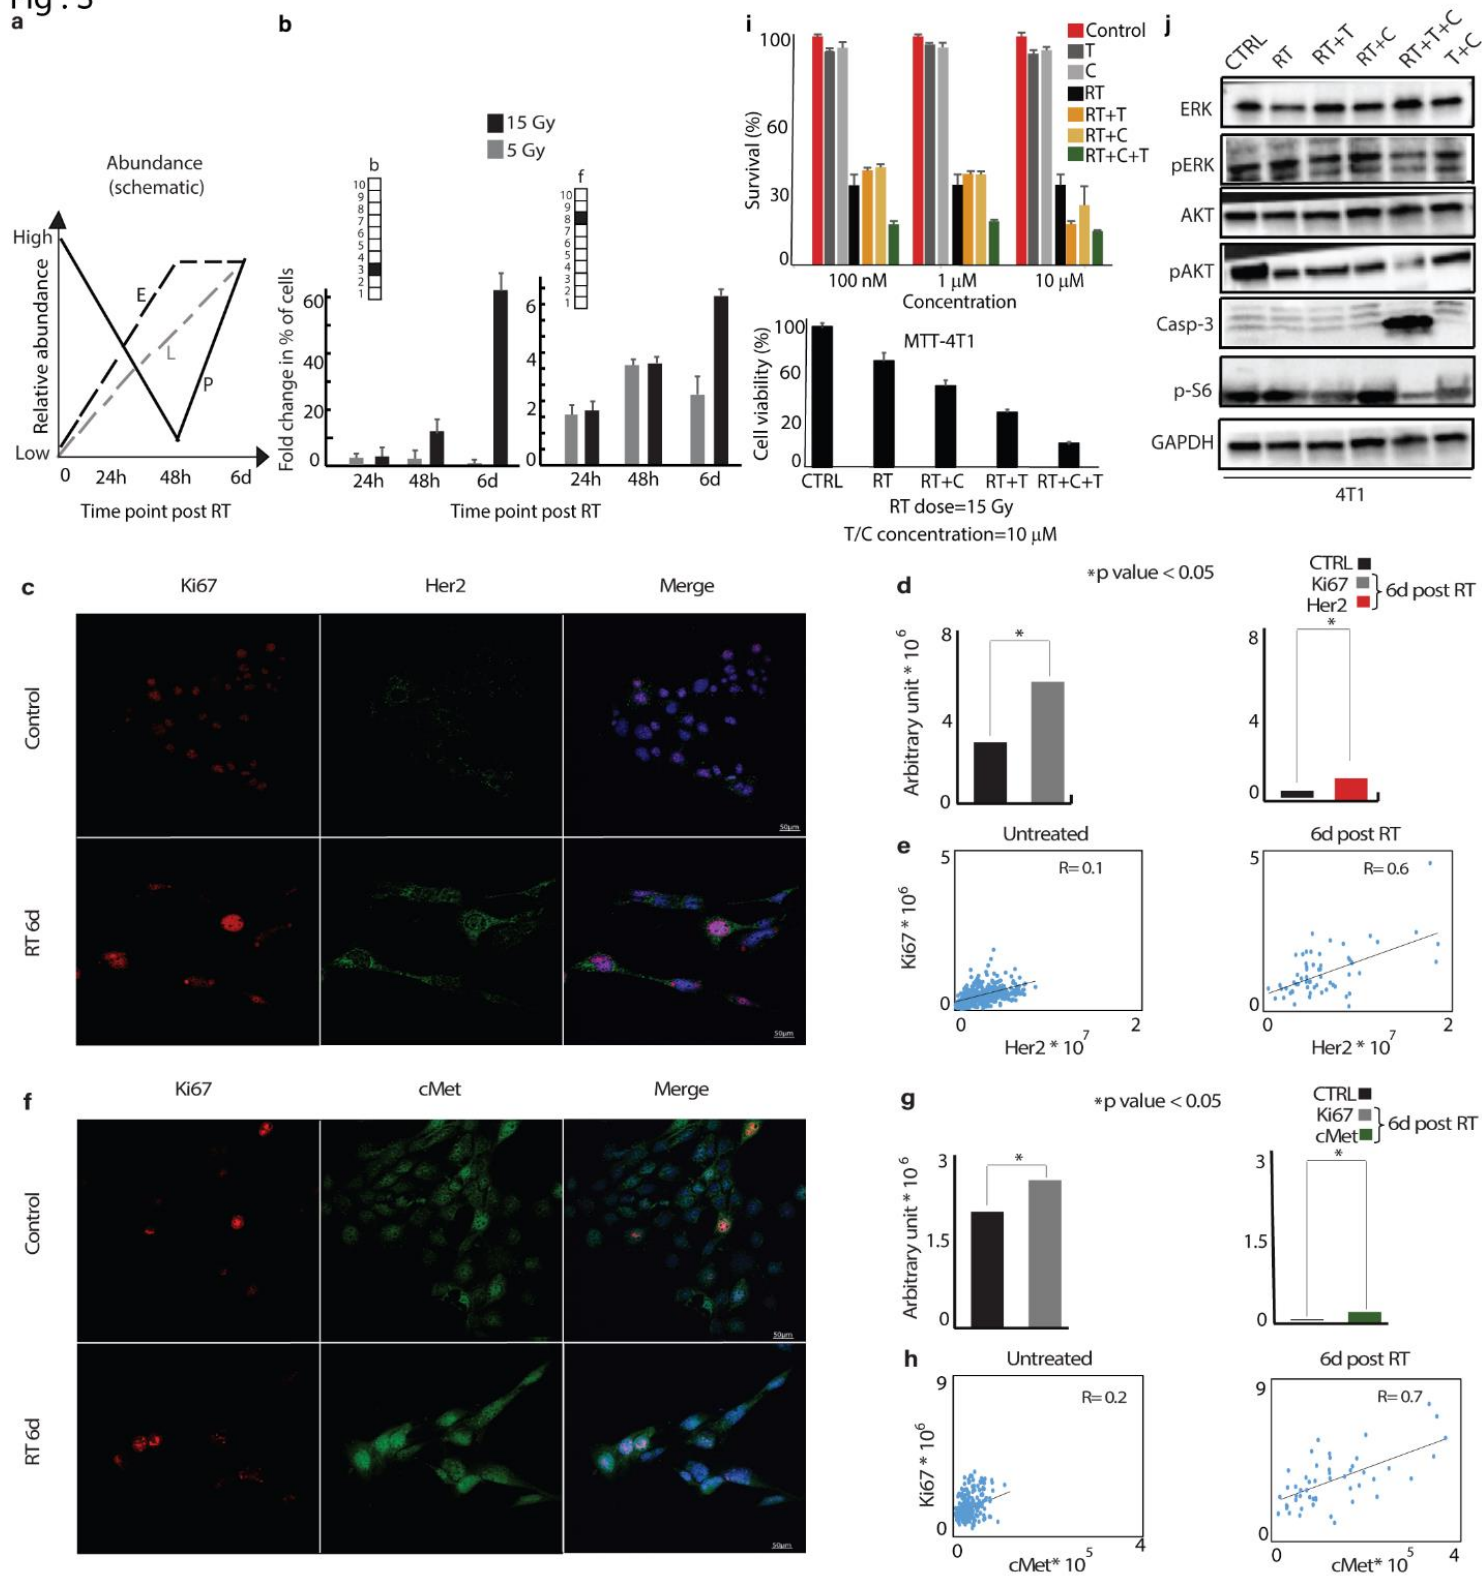

336 **Figure 5. Two distinct subpopulations expand and show proliferative properties in response to**  
 337 **RT.** (a) Schematic representation of the temporal behavior of abundant subpopulations is demonstrated. (b) Very  
 338 small subpopulations (<<1%), represented by barcodes **b** and **f**, expanded significantly following RT. (c-h) 4T1 cells

339 were irradiated with 15Gy. 6 days post-RT, cells were incubated with antibodies against Ki67, cMet and Her2 and  
340 nuclei were stained with DAPI (fluorogel II)(**e,h**) 40x lens; scale bar represents 50 $\mu$ m. (**f,i**) Sum intensities of Ki67  
341 (f, left panel); Her2 (f, right panel); Ki67 (i, left panel); cMet (i, right panel) were calculated from 8-10 fields using  
342 the NIS-Elements software (Nikon); \*P-value < 0.05. (**g,j**) Correlation plots between Ki67 and Her2 (**g**) and Ki67  
343 and cMet (**j**) were generated for each indicated condition to test co-activation represented in (**e,h**). R values  
344 indicating the extent of correlation between Ki67 and Her2 (g) Ki67 and cMet (j) were calculated before and after  
345 RT. (i) Survival rates of 4T1 cells in response to Trastuzumab (T), Crizotinib (C), RT, RT+C, RT+T and  
346 RT+T+C as detected by MB survival assays 6 days post RT (upper panel), and cell viability as measured by MTT  
347 assay (lower panel). Drugs were added from 3 days prior to RT until the end of the experiment. SD are  
348 shown. (**j**) Downstream Her2 and cMet signaling, as represented by key downstream proteins, is shown following  
349 different treatments. Our predicted combination induced high levels of cleaved caspase-3 compared to radiation  
350 alone, irradiation+T and irradiation+C. Downregulation of pAKT, pERK and p-S6 was detected when T+C was  
351 applied prior to RT.  
352

353 Subpopulation **f** harbored only process 8 (**Fig. 4g**), with induced cMet/MUC1 and reduced  
354 ECAD. Significant induction of subpopulation **f** was also observed, from undetectable levels to  
355 ~4% 6 days post-RT (**Fig. 5b**).

356 These results demonstrate an important concept: although cMet and Her2 were both induced in  
357 response to RT (**Fig. 4a**), CSSS-based analysis revealed that those two proteins were expressed  
358 in *distinct* cellular subpopulations (processes 3 and 8 do not appear in the same cells; **Fig. 4g**).  
359 The development of such large, distinct and well-defined Her2+ and cMet+ subpopulations post-  
360 RT suggests that Her2 and cMet signaling may play a significant role in 4T1 cell survival and  
361 resistance in response to irradiation.

362

### 363 **Her2 and cMet positive subpopulations demonstrate proliferative properties**

364 To characterize proliferative properties of the expanded Her2+ and cMet+ subpopulations in  
365 response to RT, we co-stained the 4T1 cell population with anti-Ki67 (proliferative biomarker)  
366 and anti-cMet and HER2 antibodies using immunofluorescent assays. Ki67, Her2 and cMet  
367 expression increased significantly in the cells surviving RT (**Fig.5c,d,f and g**). Moreover, this  
368 result was supported by enhanced coordinated expression of Her2 and Ki67 (**Fig. 5e**) as well as  
369 cMet and Ki67 (**Fig. 5h**) proteins respectively as represented by an increased correlation

370 between Her2 and Ki67; and cMet and Ki67 proteins, post-RT. This enhanced correlation in  
371 protein expression reveals the increased proliferative properties of Her2 or cMet expressing cells.

372

### 373 **Simultaneous inhibition of Her2 and cMet sensitized 4T1 cells to RT treatment**

374 We hypothesized that simultaneous inhibition of both proteins, and thus targeting of both  
375 subpopulations, may sensitize 4T1 cells to RT. Her2 and cMet represent good candidates for  
376 such a strategy, as they are both druggable oncoproteins against which FDA-approved drugs  
377 exist.

378 To validate this hypothesis, we inhibited either each protein alone or in combination, beginning 2  
379 days prior to RT and until 6 days post-RT, afterwhich cell survival was measured.

380 The Her2 inhibitor, Trastuzumab (**T**) and cMet inhibitor, Crizotinib (**C**), showed a synergistic  
381 effect in sensitizing the cells to RT (**Fig. 5i**). The combination of both drugs with RT increased  
382 cell death and also brought about depletion of signaling downstream to Her2 and cMet, as  
383 indicated by the low levels of downstream signaling proteins pERK1, pAkt and pS6K and the  
384 enhanced cleavage of the apoptotic marker Casp3 (**Fig. 5j**).

385

### 386 **Her2+ and cMet+ cellular subpopulations expanded in response to RT in-vivo**

387 To validate our hypothesis further, we implanted 4T1 cells into Balb/c mice, an  
388 immunocompetent murine model for TNBC. The cells were irradiated post-implantation using  
389 brachytherapy-focused irradiation technology adapted for mice<sup>39</sup> by CT imaging and Monte-  
390 Carlo based dosimetry (**Fig. 6a**). 4T1 tumors were then isolated and single cell suspensions were  
391 analyzed.

392 CSSS-based analysis of the tumors 6 days post-RT, when an initial shrinkage of tumors was  
 393 observed (**Fig. 6b**), revealed an expansion of subpopulations **b** and **f** (**Fig. 6c**). Moreover, 12  
 394 days post-RT, when the tumors started growing again (**Fig. 6b**) we could still detect these  
 395 expanded subpopulations (**Fig. 6c**).

Fig.6

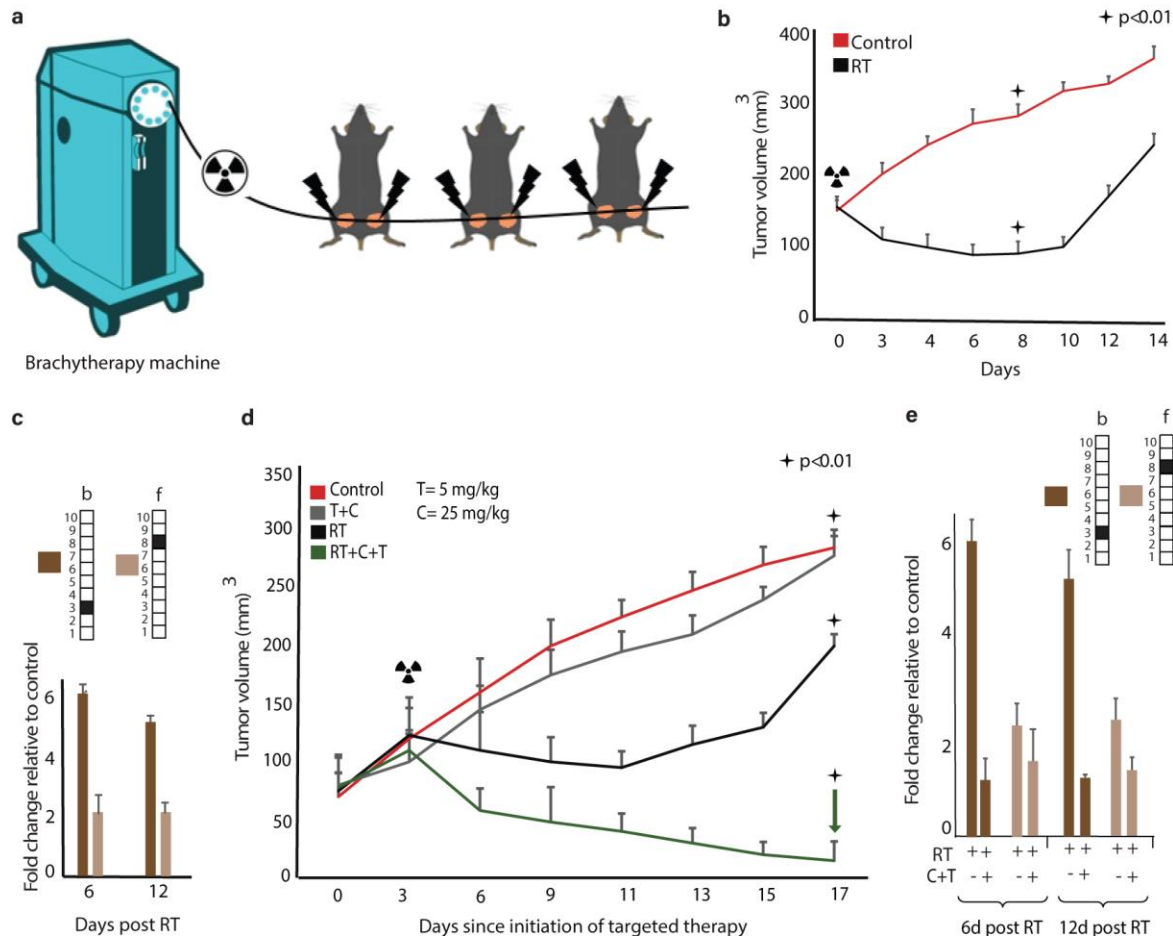

396

397 **Figure 6. Inhibition of RT-induced subpopulations sensitized tumor response to RT.**

398 **(a)** 6-7 week-old Balb/C female mice were subcutaneously injected with 4T1 cells. When tumor volumes reached 80-  
 399 100 mm<sup>3</sup>, mice were treated with brachytherapy RT on alternate days (12 Gy). **(b)** Tumor volumes in control group  
 400 (red) and RT group (black) in response to RT (p<0.01; SD shown). **(c)** Fold change in the abundance of the  
 401 subpopulations **b** and **f** as compared to untreated tumors. A significant expansion due to RT in subpopulation **b**  
 402 harboring Her2<sup>+</sup>/EGFR<sup>+</sup> and subpopulation **f** harboring cMet<sup>+</sup>/MUC1<sup>+</sup> is detected. Subpopulation size did not change  
 403 significantly after tumor regrowth (day 17). SD is shown. **(d)** Mice were subcutaneously injected with 4T1 cells and  
 404 treated with RT. Trastuzumab (T), 5 mg/kg, and Crizotinib (C), 25 mg/kg, were administrated IP 2d/week and by  
 405 gavage 5d/week respectively from d0 (3 days prior RT) until the end of the experiment (d17). Std errors and p values  
 406 are shown. **(e)** In-vivo fold changes in subpopulation **b** and **f** abundance showed optimal reduction when T and C  
 407 were used in combination with RT. These results were consistent 6 days and 12 days after RT.

408 Inhibition of both Her2 and cMet proteins significantly sensitized the tumors to RT (**Fig. 6d**).  
409 The combined treatment brought about shrinkage of the tumors and prevented development of  
410 resistance to RT (**Fig. 6d**, see the green arrow). The effect of RT plus the combined targeted  
411 therapy was highly synergistic in contrast to the effect of the two targeted drugs without RT, or  
412 RT treatment alone. Furthermore, the addition of the targeted drug combination (T+C) prior to  
413 RT brought about significant reduction in the size of subpopulations **b** and **f** (**Fig. 6e**). No other  
414 subpopulation expanded following treatment.

415

#### 416 **Targeting Her2 and cMet to sensitize human cell lines and patient-derived TNBC to RT**

417 To validate that the phenomenon of the expansion of Her2<sup>+</sup> and cMet<sup>+</sup> cellular subpopulations is  
418 not limited to TNBC mouse models, we utilized TNBC MDA-MB-231 and MDA-MB-468  
419 human-derived cell lines, and TNBC patient-derived cells (BR45).

420 Inhibition of cell growth, observed in all cell types 6 days post-RT, was followed by significant  
421 regrowth of the cells 12 days post-RT (**Fig. 7a**). Subpopulations **b** and **f**, which expanded 6 days  
422 post-RT in all cell types, maintained their size or expanded following cellular regrowth, 12 days  
423 post-RT (**Fig. 7b**).

424 Combined anti-Her2 and anti-cMet pretreatment sensitized all 3 types of human TNBC cells to  
425 RT (**Fig. 7c**). Each drug alone had a significantly smaller effect on cellular survival when  
426 compared to the combination of both drugs together with RT (**Fig. 7c**, see green arrow).

427 Moreover, depletion of the downstream signaling pathways to Her2 and cMet as well as  
428 induction of cleaved caspase 3 were observed when the cells were pretreated with anti-Her2 and  
429 anti-cMET inhibitors 1 day prior to RT (**Fig. 7d**).

430 Using patient-derived TNBC BR45 cells grown in PDX models, we demonstrated that irradiated  
 431 BR45 TNBC developed resistance to RT in a short period of time (regrowth of the tumors was  
 432 detected 6 days post-RT; **Fig. 7e**, see black curve). Pretreatment of the mice with each drug  
 433 alone prior RT demonstrated a small inhibitory effect on tumor growth (**Fig. 7e**). Pretreatment of  
 434 the mice with the combination of both drugs however, showed significant synergistic effects with

Fig. 7

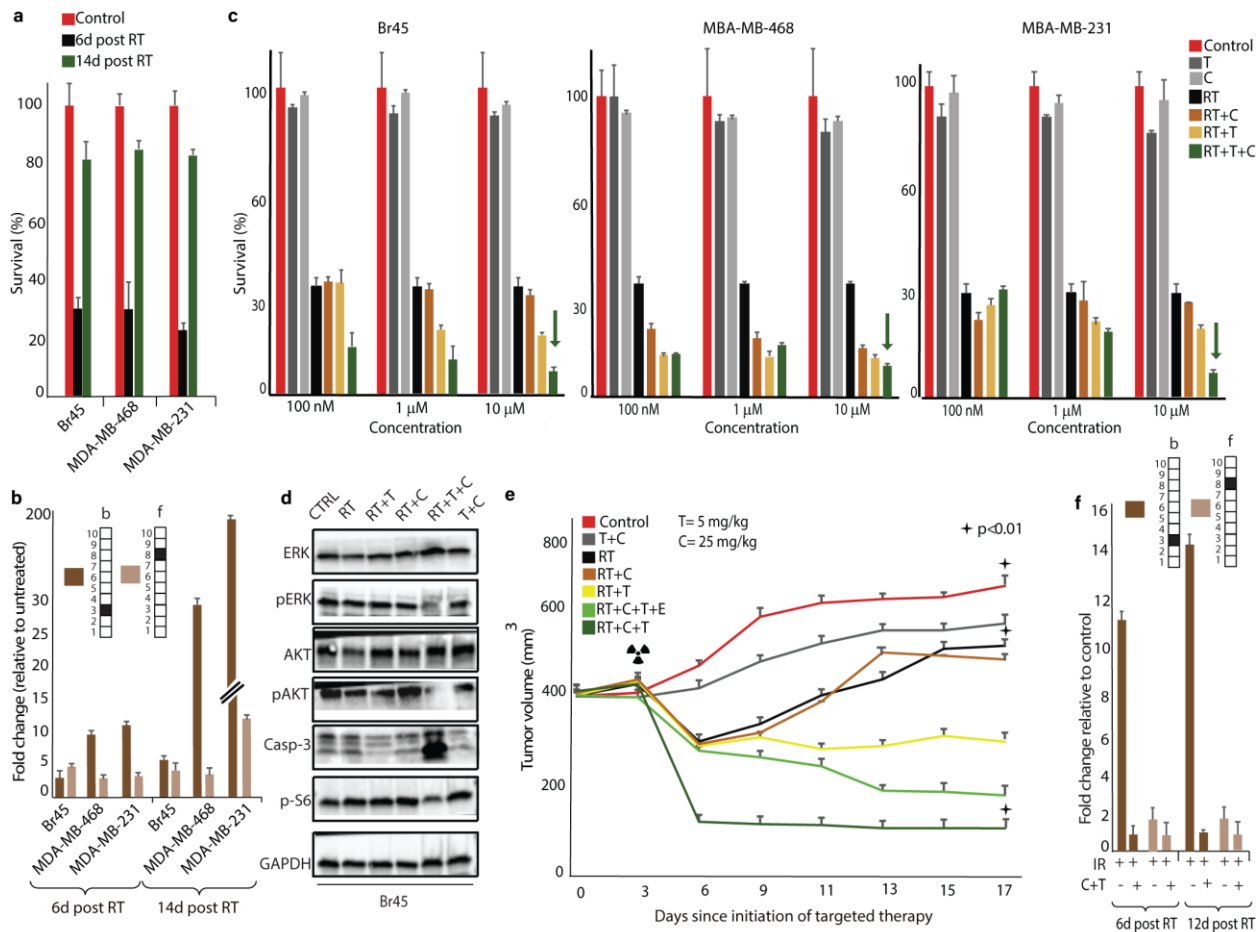

435  
 436 **Figure 7. Inhibition of expanded subpopulations sensitizes human TNBC and BR45 PDX to RT.**  
 437 (a) Survival assays show a ~30% cell survival rate 6 days post RT, with TNBC regrowth to ~80-90% confluency 14  
 438 days post RT. (b) Fold changes in the abundance of subpopulations **b** and **f** compared to untreated cells. These  
 439 subpopulations either remained unchanged or expanded following tumor regrowth. (c) Survival rates of Br45, MD-  
 440 468 and MD-231 cells in response to Trastuzumab (T)+Crizotinib (C), Trastuzumab (T)+Erlotinib (E), RT, RT+T,  
 441 RT+C, RT+T+E and RT+T+C 6 days post RT. Cellular drug treatment began 2 days prior to RT and was continued  
 442 until the end of the experiment. (d) Downstream Her2 and cMet signaling protein alterations following different  
 443 treatments. C+T combined with radiation induced higher levels of cleaved caspase-3, compared to irradiation alone  
 444 and irradiation with either C or T alone or C+T combined. C+T administration prior to RT induced the downregulation

445 of pAKT, pERK and p-S6 levels (**Fig. 3g**). **(e) C+T** sensitized TNBC response to RT in BR45 PDX in-vivo. BR45  
446 tissues were transplanted orthotopically into 60 NSG mice treated with brachytherapy on days 3 and 5 with 12 Gy  
447 and 10 Gy respectively. Drugs were administrated from d0 (3 days prior to RT) until the end of the experiment (d17).  
448 Std errors are shown. **(f) In-vivo** fold changes in the abundance of subpopulations **b** and **f** in response to **T** and **C** use.  
449 For **(a)**, **(b)** and **(c)** SD is shown.

450

451 RT, bringing about significant shrinkage of the tumor and preventing the development of  
452 resistance (**Fig. 7e**, dark green curve).

453 Adding erlotinib (an EGFR inhibitor), which according to our algorithms was not expected to  
454 significantly influence tumor growth, did not improve the results of the Trastuzumab +  
455 Crizotinib + RT treatment combination (**Fig. 7e**).

456 Subpopulations **b** and **f** were reduced when the targeted drug combination (T+C) was applied  
457 prior to RT (**Fig. 7f**, **Fig. S5**). These results suggest that CSSS-based single cell resolution of the  
458 plasticity of TNBC in response to RT provides guidance on how effective targeted drug  
459 combinations should be designed in order to overcome RT resistance.

460

## 461 **Conclusions**

462 Integrating radiobiological and biological knowledge into more efficient treatment strategies has  
463 been a major goal in the past decade. Cancer researchers and radio-oncologists are searching for  
464 new potential protein biomarkers to develop a strategy to predict and enhance tumor response to  
465 RT<sup>40</sup>. Although a plasticity of TNBC phenotypes in response to RT, such as a switch from a  
466 HER2- to HER2+ cellular population, has been previously detected<sup>13</sup>, a strategy to exploit this  
467 plasticity and provide successful treatment is still lacking.

468 In this study we provided a novel framework for the resolution of intra-tumor cellular  
469 heterogeneity of aggressive TNBC. High-throughput single cell protein data was analyzed using

470 information-theoretic surprisal analysis<sup>25</sup>. The analysis resolved unbalanced protein subnetworks  
471 in the tumor mass<sup>25</sup>, which were further assigned to single cells. Each cell was assigned a cell-  
472 specific signaling signature (CSSS), composed of a set of altered subnetworks. Cells sharing the  
473 same CSSS, were considered a subpopulation.

474 The demonstrated strategy not only resolved the overexpressed biomarkers or altered protein-  
475 protein correlation networks in the tumor in response to RT treatment, but also mapped single  
476 cell signaling signatures within the tumor mass. This information enabled resolution of the  
477 distinct cellular subpopulations, information that is critical for accurate treatment design.

478 Our analysis requires only one tissue/sample to elucidate the perturbed networks operating in  
479 each tumor. The large number of single cells analyzed (>50,000/sample) is what provides the  
480 high resolution of tumor heterogeneity. This is in contrast to bulk analysis that requires large  
481 datasets comparing multiple tissues in order to reveal the altered networks with high resolution in  
482 each patient<sup>17,24</sup>. Furthermore, our analysis efficiently identifies small cellular subpopulations,  
483 which are likely to be missed in bulk analyses.

484 Using the CSSS strategy we demonstrated that two distinct cellular subpopulations, harboring  
485 altered subnetworks with induced Her2 and cMet proteins, respectively, expanded in tumors in  
486 response to RT. Using in-vitro and in-vivo murine models, human cell lines and patient-derived  
487 TNBC, we showed that efficient sensitization of aggressive TNBC to RT could be achieved only  
488 when Her2 and cMet proteins were inhibited simultaneously.

489 Despite the fact that the in-vivo follow-up was only up to three weeks, the results demonstrated a  
490 significant synergistic effect in tumor response to RT and combined targeted therapy, compared  
491 to RT alone. While RT-treated tumors developed resistance, the tumors pre-treated with Her2  
492 and cMet inhibitors demonstrated durable remission. In an extended follow-up period there is a



493 chance that other minor sub-populations may arise, which were not seen during the three weeks.  
494 In a clinical setting a longer patient-specific follow-up might provide additional data for a more  
495 accurate treatment plan.  
496 In summary, we demonstrate a novel approach to resolve in depth intra-tumor heterogeneity at  
497 the single cell level. This strategy provides an essential step towards the accurate design of  
498 targeted drug combinations for tumors changing phenotypes in response to RT. Elucidation  
499 and detailed analysis of TNBC plasticity allows for the sensitization of tumors to RT.  
500 Importantly, this approach allows for the mapping of distinct cellular subpopulations in a single  
501 tumor, without the need to be compared to and analyzed relative to other tumors, such as in the  
502 case of bulk analyses. The value of the proposed strategy will increase alongside the continued  
503 development of single-cell and mass cytometry techniques, which will allow for the  
504 simultaneous detecting of dozens of parameters<sup>41</sup> in statistically significant numbers (>50000-  
505 1,000,000) of single cells obtained from a single tumor.

506

## 507 **Materials and Methods:**

### 508 **Cell lines and culture.**

509 Murine 4T1 cells, mimicking stage IV of TNBC model were a kind gift from Dr. Zvi Granot  
510 (Faculty of Medicine, Hebrew University of Jerusalem). Human TNBC cells MDA-MB-468 and  
511 MDA-MB-231 were acquired from ATCC and authenticated by the Genomic Center of the  
512 Technion Institute (Haifa). PDX human derived xenograft BR45 were obtained from the  
513 Oncology Department at Hadassah –Jerusalem Medical Center with prior written informed  
514 consent.

515 4T1 cells were routinely maintained in Dulbecco's modified Eagle's medium (DMEM) MDA-  
516 MB-231 and MDA-MB-468 were maintained in RPMI-1640 medium; supplemented with 10%  
517 FBS, 4 mM L-glutamine, 100 U/mL Penicillin and 100 µg/mL Streptomycin. All media and  
518 supplements were from Biological Industries, Israel. All cell lines were maintained at 37 °C in  
519 5% CO<sub>2</sub>. Cells were checked on a routine basis for the absence of mycoplasma contamination.  
520 Irradiation of parental cells: Cells were treated by single-dose radiation with 5, 10, and 15 Gy  
521 doses of γ-rays of <sup>60</sup>Co by a radiotherapy unit (gamma cell 220) at a dose rate of 1.5 Gy/min. See  
522 Supplementary Methods for more details.

### 523 **Murine models.**

524 Syngeneic models: 2.0×10<sup>5</sup> 4T1 cells were inoculated subcutaneously on 6-7 week old female  
525 Balb/c mice.

526 Alogeneic model: BR45 tumors were induced in NSG mice either by injecting 4.0×10<sup>6</sup> cells  
527 orthopedically or by subcutaneously transplanting xenografts.

528 After reaching the desired tumor volume (80-100mm<sup>3</sup>), mice were randomly grouped to  
529 approximately 8-10 animals per cage and treatment was initialized. Tumor sizes were routinely  
530 measured with an electronic calliper every two days and their volumes were obtained using the  
531 formula  $V = (W (2) \times L)/2$ . Mice were kept under conventional pathogen-free conditions. All in-  
532 vivo experiments were performed with the approval of the Hebrew University of Jerusalem  
533 IACUC. See Supplementary Methods for more details.

### 534 **In-vivo treatments.**

535 High dose rate (HDR) brachytherapy: Tumors were irradiated by applying a brachytherapy  
536 afterloader (GammaMed™ HDR, Iridium 192). 12 Gy was applied on two alternative days. The

537 treatment field was designed using MRI imaging to deliver optimal radiation doses to the  
538 targeted tumors and limit exposure to surround organs at risk.

539 Targeted inhibitors: Trastuzumab (trastuzumab; Her2 inhibitor) was purchased from Teva  
540 Pharmaceutical Industries Ltd. Crizotinib (cMet inhibitor, #12087-50) and Erlotinib (#10483-1)  
541 were purchased from Cayman Chemical. (See Suppl. Methods for doses and regimens). The  
542 treatment was based on the prediction by surprisal analysis and in-vitro validation.

#### 543 **Flow Cytometry.**

544 Antibodies: The following fluorescently tagged antibodies, were obtained from BioLegend, Inc.:  
545 EpCAM (9C4/G8.8), CD45 (2D1/104), CD31(WM95/390), CD140a (16A1/APA5), CD44  
546 (IM7), E-Cadherin (DECMA-1), EGFR (AY13), CD24 (M1/69), CD24 (ML5), KIT  
547 (ACK2/104D2), CD133 (315-2C11/clone7), PD-L1 (10F.9G2/29E.2A3). ERBB2 / Her2 (5J297)  
548 was obtained from LifeSpan BioScience. Anti-MUC1 Polyclonal Antibody and Anti-Met  
549 Polyclonal Antibody were both obtained from Bioss Antibodies Inc. (See Table S5).

550 Preparation of single cell suspensions and flow cytometry analysis: Following mouse  
551 euthanization, tumors were resected and mechanically disrupted to generate a single-cell  
552 suspension. Red blood cells were lysed (15mM NH<sub>4</sub>Cl + 10mM KHCO<sub>3</sub> for 5 min at R.T.) and  
553 CD16/32 antibody was used to block the endogenous FC ( #101301, Biolegend). Cells were  
554 analysed using a BD FACS LSR Fortessa. Compensation control was done using UltraComp  
555 eBeads (#01-2222-41, ThermoFisher). 50,000 cells were profiled for each sample.

556 Preliminary data analysis was done using FlowJo VX software. The output data were extracted  
557 into an excel file in which each row represented a single cell and each column showed the

558 intensity of each assayed protein (FCS Extract 1.02 software). For more details see  
559 Supplementary Methods.

560 **Western blot analysis.**

561 Cell pellets were lysed with a 20% SDS buffer. The protein content of each lysate was  
562 determined with a Pierce BCA Protein Assay Kit (#23225, ThermoFisher). Equal protein  
563 aliquots were subjected to SDS-PAGE (Criterion Stain Free, 4-15 % acrylamide, BIO-RAD)  
564 under reducing conditions and proteins were transferred to a nitrocellulose membrane.  
565 (Millipore). Membranes were blocked with 5% non-fat milk for 1 hour at R.T. and probed with  
566 the appropriate antibody (Supplementary Methods), followed by horseradish peroxidase-  
567 conjugated secondary antibody (#123449, Jackson ImmunoResearch) and a chemiluminescent  
568 substrate (ECL #170-5061, Bio-Rad).

569 **Survival assay.**

570 Cells were seeded at 70% confluency and treated as required for different time points. Cells were  
571 washed with PBS and fixed with 4% PFA for 10 min. at R.T. The fixed cells were stained with  
572 Methylene Blue (MB) for 1 hour at R.T., washed and air dried overnight. The dye was extracted  
573 with 0.1M HCl for 1 hour at R.T. Absorbance was read at 630 nm.

574 **MTT assay.**

575 Cells were seeded and treated as indicated in a 96 well plate for 6 days. Cell viability was  
576 checked using MTT assay kit (#ab211091, Abcam). Equal volumes of MTT solution and culture  
577 media were added to each well and incubated for 3 hours at 37 °C. MTT solvent was added to  
578 each well, and then the plate was covered with aluminum foil and put on the orbital shaker for 15  
579 minutes. Absorbance was read at 590nm following 1 hour.

580 **Immunofluorescence**

581 Cells were grown on coverslips in six-well plates to reach 70% confluency by the next day, then  
582 fixed and permeabilized with cold absolute methanol. Afterwards, they were blocked with CAS  
583 blocker (cat. no. ZY-008120) and washed 3 times for 5 minutes with PBS, then stained with  
584 primary antibodies as follows: Purified anti-mouse/human Ki-67 (BLG-151202), Rabbit Anti-Met  
585 (c Met) Polyclonal Antibody (BS-0668R), Neu (F-11) SC-7301. After washing 3 times with PBS  
586 for 5 minutes, cells were stained with secondary antibodies for 1 hr at room temperature in the  
587 dark to visualize the aforementioned primary antibodies. Secondary antibodies conjugated to  
588 fluorophores were as follows: Goat anti-rat IgG H&L conjugated with Alexa Fluor 647 (1:400)  
589 (cat. no. 712605153), Affini-pure Goat anti-mouse IgG (H+L) conjugated with Alexa Fluor 488  
590 (1:150) (cat. no. 115545003), and Affini-pure Goat anti-Rabbit IgG (H+ L) conjugated with Alexa  
591 Fluor 488 (1:150) (cat. no. 111545003). All secondary antibodies were purchased from Jackson  
592 ImmunoResearch. After washing 3 times with PBS, cell slides were mounted using fluorogel III  
593 mixed with DAPI (Bar Naor, cat. no. 17985-01) to stain the nuclei. A Spinning Disk Confocal  
594 microscope was used to visualize the expression of biomarkers of interest. The analysis was done  
595 with NIS elements software.

596 **Single cell data analysis.**

597 The analysis is composed of two steps: First - single cell surprisal analysis (SA) is utilized to  
598 identify unbalanced processes in the cellular population as previously described<sup>25</sup>. Briefly, the  
599 data matrix obtained from the flow cytometry analysis, in which columns are expression levels  
600 of the tested proteins and rows are single cells, is used as an input for surprisal analysis  
601 (calculations are performed in MATLAB) . The analysis is based on the premise that all  
602 biological systems reach a state of minimal free energy under standard temperature and pressure

603 given the existing environmental and genomic constraints. The analysis identifies protein  
604 expression levels at the reference state, and the deviations in those levels due to the existing  
605 constraints. RT treatment imposes a constraint but more than one constraint may be identified in  
606 the system. Each constraint is associated with an altered protein subnetwork (= unbalanced  
607 biological process) that deviates the system from the reference state and causes the coordinated  
608 deviations of a subset of proteins from their steady state expression level.

609 In heterogeneous tissues many processes occur through the actions of individual cells. Thus the  
610 analysis was implemented independently for each measured cell. The levels of different proteins  
611 for each cell at each time point  $t$  are represented as Equation 1:

$$612 \quad \underbrace{X_i(\text{cell}, t)}_{\text{experimental level of protein } i} = \underbrace{X_i^0(\text{cell}, t)}_{\text{level of protein } i \text{ in the reference state}} \exp \left( \underbrace{-\sum_{\alpha=1} G_{i\alpha} \lambda_{\alpha}(\text{cell}, t)}_{\text{changes in protein levels due to the constraints } \alpha = 1, 2, \dots} \right) \quad (1)$$

613 Here,  $X_i^0(\text{cell}, t)$  is the expected expression level of protein  $i$  at the reference state in a  
614 measured cell at the time point  $t$ . The exponential term in Equation 1 represents the deviation  
615 from the reference value due to the constraints, including those imposed by Irradiation.  $G_{i\alpha}$  are  
616 weights of protein  $i$  in the unbalanced processes  $\alpha = 1, 2, \dots$ . Proteins deviating in a similar  
617 manner from the steady state are grouped into unbalanced processes (Figure 3).  $\lambda_{\alpha}(\text{cell}, t)$  is the  
618 amplitude of an unbalanced processes  $\alpha = 1, 2, \dots$  in a cell  $i$  at time point  $t$ . (Example for  $G_{i\alpha}$   
619 values, as calculated for 4T1 models is presented in Table S4. Several unbalanced processes can  
620 be found in the system, however not all processes are active in all cells.

621 Second step: To further map distinct subpopulations within the entire cellular population, where  
622 all the cells sharing the same set of unbalanced processes, or CSSS, are grouped into

623 subpopulations (Figure 3). Each CSSS is transformed into a barcode for the simplicity of  
624 calculations and representation.

625 Barcode calculations: The output lambda file from the surprisal analysis is then used as an input  
626 file for the Python script in order to obtain a specific barcode for each single cell in which a  
627 certain unbalanced process is active/inactive. Briefly,  $\lambda_a(\text{cell}, t)$  values are sorted and plotted as  
628 sigmoid plots in each process. Only  $\lambda_a(\text{cell}, t)$  values located on the tails of the sorted  
629 distributions are considered and used further for the barcode calculations (Figure S4). Several  
630 processes may be active in each cell, as amplitudes,  $\lambda_a(\text{cell}, t)$ , of several processes may be  
631 significant in each cell. See Supplementary Methods section for more details.

### 632 **Bulk analysis of gene expression data.**

633 The expression level of each transcript is decomposed by surprisal analysis due to environmental  
634 or genomic constraints present in the system<sup>14,24</sup>. Any genetic defect or epigenetic perturbation  
635 can impose a constraint that alters a part of the gene expression network structure in the system,  
636 which in turn causes specific group of transcripts (=subnetwork) to undergo coordinated changes  
637 in their expression levels. This group of co-varying transcripts is defined as an unbalanced process.  
638 Each of the altered transcripts can be involved in several unbalanced processes due to the non-  
639 linearity of biological networks. To deconstruct gene expression levels into the levels at the steady  
640 state and deviation thereof, the following equation is utilized:

641  $\ln X_i(k) = \ln X_i^0(k) - \sum_{\alpha=1} G_{i\alpha} \lambda_{\alpha}(k)$ <sup>14,24</sup>.  $X_i(k)$  is the actual, experimentally measured  
642 expression level of the transcript i in a cancer sample k.  $X_i^0(k)$  are the expression levels at the  
643 steady state. In cases where  $X_i(k) \neq X_i^0$ , we assume that the expression level of transcript i

644 was altered due to constraints that operate in the system. The analysis uncovers the complete set  
645 of constraints and the associated unbalanced processes.

646 The unbalanced processes are indexed by  $\alpha = 1, 2, 3, \dots$ . Several unbalanced processes may operate  
647 in each tumor. The term  $\sum_{\alpha=1} G_{i\alpha} \lambda_{\alpha}(k)$  represents the sum of deviations in expression level of  
648 protein  $i$  due to the various constraints, or unbalanced processes that exist in the sample. The

649  $\lambda_{\alpha}(k)$  values, denote the amplitude of each unbalanced process, in every sample  $k$ , i.e. the extent  
650 of the participation of each unbalanced process  $\alpha$ , in every sample/tumor  $k$ . The amplitude,  $\lambda_{\alpha}(k)$

651 (**Table S2**), determines whether process  $\alpha$  is active in the sample  $k$ , and to what extent. A detailed  
652 description of the surprisal analysis process can be found in <sup>14,17,24</sup>. (2) The  $G_{i\alpha}$  values (**Table**  
653 **S1**), denoting the extent of participation of each individual protein  $i$  in the specific unbalanced  
654 process,  $\alpha$ .

655 *Determination of the number of significant unbalanced processes.*

656 As described previously <sup>24,37</sup>.

657 *Meaning of the negative and positive signs in the analysis.*

658 The term  $G_{i\alpha}$  denotes the degree of participation of the transcript  $i$  in the unbalanced process  $\alpha$ ,  
659 and its sign indicates the correlation or anti-correlation between transcripts in the same process.

660 For example, in a certain process  $\alpha$ , transcripts can be assigned the values:  $G_{\text{transcript1},\alpha} = -0.013$ ,  
661  $G_{\text{transcript2},\alpha} = 0.02$ , and  $G_{\text{transcript3},\alpha} = 0.0003$ , indicating that this process altered transcripts 1 and 2  
662 in opposite directions (i.e. transcript 1 is upregulated and transcript 2 is downregulated, or vice  
663 versa due to the process  $\alpha$ ), while not affecting transcript 3.

664 Importantly, not all processes are active in all samples. The term  $\lambda_{\alpha}(k)$  represents the importance  
665 of the unbalanced process  $\alpha$  in the tumor  $k$ . Its sign indicates the correlation or anti-correlation



666 between the same processes in different tumors. For example, if process  $\alpha$  is assigned the  
667 values:  $\lambda_{\alpha}(1) = 3.1$ ,  $\lambda_{\alpha}(2) = 0.02$ , and  $\lambda_{\alpha}(5) = 2.5$ , it means that this process influences the tumors  
668 of the patients indexed 1 and 2 in the same direction, while it is inactive in patient 5.  
669 To calculate an induction or reduction due to process  $a$ , a product  $G_{ia}\lambda_{\alpha}(k)$  is computed.  
670 To provide a biological interpretation of each unbalanced process only those transcripts that were  
671 located on the tails (Table S1) were included in the analysis. The classification of the transcripts  
672 into biological categories was performed using David database and presented in Table S1.

673

#### 674 **Acknowledgements**

675 The project was funded by the Israel Science Foundation (ISF).  
676 We acknowledge Science Training Encouraging Peace (STEP) for partial funding of this  
677 research, and Efrat Flashner-Abramson (H.A's STEP partner) for helpful input.

678

679 **Author contributions:** H.A., A.M.R., A.M. and N.K.-B. designed research; H.A., A.M.R.,  
680 A.M., S.V., S.S., K.S., A.M. and N.K.-B. performed research; S.V., E.F.-A., S.S., T.P.Y.,  
681 A.G., Z.G., I.B.P and A.M. contributed experimental/analytical tools. H.A., A.M.R., S.V. and  
682 N.K.-B. analyzed data; H.A., E.F.A., A.M., K.S. and N.K.-B wrote the paper with contributions  
683 from all authors.

684

685 **The authors declare no conflict of interest.**

686

687 **Data availability**

688 The data supporting the findings of this study are available in this paper or the Supplementary  
689 Information. Any other raw data that support this study are available from the corresponding  
690 author upon request.

691 **References:**

- 692 1. Bernier, J., Hall, E. J. & Giaccia, A. Radiation oncology: a century of achievements. *Nat.*  
693 *Rev. Cancer* **4**, 737–747 (2004).
- 694 2. Wang, J.-S., Wang, H.-J. & Qian, H.-L. Biological effects of radiation on cancer cells.  
695 *Mil. Med. Res.* **5**, 20 (2018).
- 696 3. Arnold, K. M., Opdenaker, L. M., Flynn, N. J., Appeah, D. K. & Sims-Mourtada, J.  
697 Radiation induces an inflammatory response that results in STAT3-dependent changes in  
698 cellular plasticity and radioresistance of breast cancer stem-like cells. *Int. J. Radiat. Biol.*  
699 (2020). doi:10.1080/09553002.2020.1705423
- 700 4. Speers, C. *et al.* Androgen receptor as a mediator and biomarker of radioresistance in  
701 triple-negative breast cancer. *npj Breast Cancer* (2017). doi:10.1038/s41523-017-0038-2
- 702 5. Jutzy, J. M. S., Lemons, J. M., Luke, J. J. & Chmura, S. J. The Evolution of Radiation  
703 Therapy in Metastatic Breast Cancer: From Local Therapy to Systemic Agent.  
704 *International Journal of Breast Cancer* **2018**, (2018).
- 705 6. Mehta, M. *et al.* HuR silencing elicits oxidative stress and DNA damage and sensitizes  
706 human triple-negative breast cancer cells to radiotherapy. *Oncotarget* **7**, 64820–64835  
707 (2016).
- 708 7. Kyndi, M. *et al.* Estrogen receptor, progesterone receptor, HER-2, and response to  
709 postmastectomy radiotherapy in high-risk breast cancer: The Danish Breast Cancer  
710 Cooperative Group. *J. Clin. Oncol.* (2008). doi:10.1200/JCO.2007.14.5565
- 711 8. Johnson, J. *et al.* Targeting PI3K and AMPK $\alpha$  Signaling Alone or in Combination to  
712 Enhance Radiosensitivity of Triple Negative Breast Cancer. *Cells* **9**, 1253 (2020).
- 713 9. Abramson, V. G. & Mayer, I. A. Molecular Heterogeneity of Triple-Negative Breast  
714 Cancer. *Curr. Breast Cancer Rep.* **6**, 154–158 (2014).
- 715 10. He, M. Y. *et al.* Radiotherapy in triple-negative breast cancer: Current situation and  
716 upcoming strategies. *Crit. Rev. Oncol. Hematol.* **131**, 96–101 (2018).
- 717 11. Karaayvaz, M. *et al.* Unravelling subclonal heterogeneity and aggressive disease states in

- 718 TNBC through single-cell RNA-seq. *Nat. Commun.* **9**, 3588 (2018).
- 719 12. Lee, K. L., Kuo, Y. C., Ho, Y. S. & Huang, Y. H. Triple-negative breast cancer: Current  
720 understanding and future therapeutic breakthrough targeting cancer stemness. *Cancers* **11**,  
721 (2019).
- 722 13. Castiglioni, F. *et al.* Radiation effects on development of HER2-positive breast  
723 carcinomas. *Clin. Cancer Res.* **13**, 46–51 (2007).
- 724 14. Remacle, F., Kravchenko-Balasha, N., Levitzki, A. & Levine, R. D. Information-theoretic  
725 analysis of phenotype changes in early stages of carcinogenesis. *Proc. Natl. Acad. Sci. U.*  
726 *S. A.* **107**, 10324–10329 (2010).
- 727 15. Flashner-Abramson, E., Abramson, J., White, F. M. & Kravchenko-Balasha, N. A  
728 thermodynamic-based approach for the resolution and prediction of protein network  
729 structures. *Chem. Phys.* **514**, 20–30 (2018).
- 730 16. Kravchenko-Balasha, N., Shin, Y. S., Sutherland, A., Levine, R. D. & Heath, J. R.  
731 Intercellular signaling through secreted proteins induces free-energy gradient-directed cell  
732 movement. *Proc. Natl. Acad. Sci.* **113**, 5520–5 (2016).
- 733 17. Flashner-Abramson, E., Vasudevan, S., Adejumobi, I. A., Sonnenblick, A. & Kravchenko-  
734 Balasha, N. Decoding cancer heterogeneity: Studying patient-specific signaling signatures  
735 towards personalized cancer therapy. *Theranostics* **9**, 5149–5165 (2019).
- 736 18. Suppression of Invasion and Metastasis of Triple-Negative Breast Cancer Lines by  
737 Pharmacological or Genetic Inhibition of Slug Activity. *Neoplasia* **16**, 1047–1058 (2014).
- 738 19. Linderman, G. C., Rachh, M., Hoskins, J. G., Steinerberger, S. & Kluger, Y. Fast  
739 interpolation-based t-SNE for improved visualization of single-cell RNA-seq data. *Nat.*  
740 *Methods* **16**, 243–245 (2019).
- 741 20. Kholodenko, B., Yaffe, M. B. & Kolch, W. Computational Approaches for Analyzing  
742 Information Flow in Biological Networks. *Sci. Signal.* **5**, re1–re1 (2012).
- 743 21. Wei, W. *et al.* Single-Cell Phosphoproteomics Resolves Adaptive Signaling Dynamics  
744 and Informs Targeted Combination Therapy in Glioblastoma. *Cancer Cell* **29**, 563–73  
745 (2016).
- 746 22. Amir, E. D. *et al.* viSNE enables visualization of high dimensional single-cell data and  
747 reveals phenotypic heterogeneity of leukemia. *Nat. Biotechnol.* **31**, 545–552 (2013).
- 748 23. Kravchenko-Balasha, N., Johnson, H., White, F. M., Heath, J. R. & Levine, R. D. A

- 749 Thermodynamic-Based Interpretation of Protein Expression Heterogeneity in Different  
750 Glioblastoma Multiforme Tumors Identifies Tumor-Specific Unbalanced Processes. *J.*  
751 *Phys. Chem. B* **120**, 5990–7 (2016).
- 752 24. Vasudevan, S., Flashner-Abramson, E., Remacle, F., Levine, R. D. & Kravchenko-  
753 Balasha, N. Personalized disease signatures through information-theoretic compaction of  
754 big cancer data. *Proc. Natl. Acad. Sci. U. S. A.* **115**, 7694–7699 (2018).
- 755 25. Poovathingal, S. K., Kravchenko-Balasha, N., Shin, Y. S., Levine, R. D. & Heath, J. R.  
756 Critical Points in Tumorigenesis: A Carcinogen-Initiated Phase Transition Analyzed via  
757 Single-Cell Proteomics. *Small* **12**, 1425–31 (2016).
- 758 26. Levine, R. D. & Bernstein, R. B. Energy disposal and energy consumption in elementary  
759 chemical reactions. Information theoretic approach. *Acc. Chem. Res.* **7**, 393–400 (1974).
- 760 27. Levine, R. D. An information theoretical approach to inversion problems. *J. Phys. A.*  
761 *Math. Gen.* **13**, 91 (1980).
- 762 28. Kravchenko-Balasha N, Shin, Y. S., Levine R. D. & Heath, J. R. Intercellular Signaling  
763 Through Secreted Proteins Induces Free Energy Gradient-directed Cell Movement. *Proc*  
764 *Natl Acad Sci U S A* (**accepted**), (2016).
- 765 29. Fleisher, B., Clarke, C. & Ait-Oudhia, S. Current advances in biomarkers for targeted  
766 therapy in triple-negative breast cancer. *Breast cancer (Dove Med. Press.* **8**, 183–197  
767 (2016).
- 768 30. Duru, N. *et al.* HER2-Associated Radioresistance of Breast Cancer Stem Cells Isolated  
769 from HER2-Negative Breast Cancer Cells. *Clin. Cancer Res.* **18**, 6634–6647 (2012).
- 770 31. Soysal, S. D. *et al.* EpCAM expression varies significantly and is differentially associated  
771 with prognosis in the luminal B HER2+, basal-like, and HER2 intrinsic subtypes of breast  
772 cancer. *Br. J. Cancer* **108**, 1480–1487 (2013).
- 773 32. Nakagawa, M. *et al.* Expression of p53, Ki-67, E-cadherin, N-cadherin and TOP2A in  
774 triple-negative breast cancer. *Anticancer Res.* **31**, 2389–93 (2011).
- 775 33. Sahlberg, S. H., Spiegelberg, D., Glimelius, B., Stenerlöv, B. & Nestor, M. Evaluation of  
776 cancer stem cell markers CD133, CD44, CD24: association with AKT isoforms and  
777 radiation resistance in colon cancer cells. *PLoS One* **9**, e94621 (2014).
- 778 34. Siroy, A. *et al.* MUC1 is expressed at high frequency in early-stage basal-like triple-  
779 negative breast cancer. *Hum. Pathol.* **44**, 2159–2166 (2013).

- 780 35. Wang, Z.-Q. *et al.* PD-L1 and intratumoral immune response in breast cancer. *Oncotarget*  
781 **8**, 51641–51651 (2017).
- 782 36. Bauer, J. A. *et al.* Identification of markers of taxane sensitivity using proteomic and  
783 genomic analyses of breast tumors from patients receiving neoadjuvant paclitaxel and  
784 radiation. *Clin. Cancer Res.* (2010). doi:10.1158/1078-0432.CCR-09-1091
- 785 37. Dagan, H. *et al.* Exploring Alzheimer’s Disease Molecular Variability via Calculation of  
786 Personalized Transcriptional Signatures. *Biomolecules* **10**, 503 (2020).
- 787 38. Kuhlmann, L., Cummins, E., Samudio, I. & Kislinger, T. Cell-surface proteomics for the  
788 identification of novel therapeutic targets in cancer. *Expert Rev. Proteomics* **15**, 259–275  
789 (2018).
- 790 39. Meirovitz, A. *et al.* Role of heparanase in radiation-enhanced invasiveness of pancreatic  
791 carcinoma. *Cancer Res.* **71**, 2772–2780 (2011).
- 792 40. Baumann, M. *et al.* Radiation oncology in the era of precision medicine. *Nat. Rev. Cancer*  
793 **16**, 234–249 (2016).
- 794 41. Spitzer, M. H. & Nolan, G. P. Leading Edge Primer Mass Cytometry: Single Cells, Many  
795 Features. (2016). doi:10.1016/j.cell.2016.04.019  
796
